# Supplementary material for: Changing diagnostic criteria for gestational diabetes (CDC4G) in Sweden: A stepped wedge cluster randomised trial
Source: PubMed Central journal article supplement (PMC11262657; doi:10.1371/journal.pmed.1004420), 2024-07-08
Supplement: pmed.1004420.s001.pdf [file pmed.1004420.s001.pdf]

CONSORT 2010 checklist of information to include when reporting a cluster randomised trial

| Section/topic and item No  | Standard checklist item                                                                                                                  | Extension for cluster designs                                                              | Page No*                                                                                                         |
|----------------------------|------------------------------------------------------------------------------------------------------------------------------------------|--------------------------------------------------------------------------------------------|------------------------------------------------------------------------------------------------------------------|
| <b>Title and abstract</b>  |                                                                                                                                          |                                                                                            |                                                                                                                  |
| 1a                         | Identification as a randomised trial in the title                                                                                        | Identification as a cluster randomised trial in the title                                  | 1                                                                                                                |
| 1b                         | Structured summary of trial design, methods, results, and conclusions (for specific guidance see CONSORT for abstracts) <sup>11 12</sup> | See table 2                                                                                | See section “Abstract”                                                                                           |
| <b>Introduction</b>        |                                                                                                                                          |                                                                                            |                                                                                                                  |
| Background and objectives: |                                                                                                                                          |                                                                                            |                                                                                                                  |
| 2a                         | Scientific background and explanation of rationale                                                                                       | Rationale for using a cluster design                                                       | See section “introduction”                                                                                       |
| 2b                         | Specific objectives or hypotheses                                                                                                        | Whether objectives pertain to the cluster level, the individual participant level, or both | See section “introduction”, paragraph 3                                                                          |
| <b>Methods</b>             |                                                                                                                                          |                                                                                            |                                                                                                                  |
| Trial design:              |                                                                                                                                          |                                                                                            |                                                                                                                  |
| 3a                         | Description of trial design (such as parallel, factorial) including allocation ratio                                                     | Definition of cluster and description of how the design features apply to the clusters     | See section “study design and participants”, paragraph 1-2.<br>Section “Randomisation and masking”, paragraph 1. |
| 3b                         | Important changes to methods after trial commencement (such as eligibility criteria), with reasons                                       |                                                                                            | See section “study design and participants”, paragraph 3                                                         |

| Section/topic and item No | Standard checklist item                                                                                                               | Extension for cluster designs                                                                    | Page No*                                                                                                                                                                                                                 |
|---------------------------|---------------------------------------------------------------------------------------------------------------------------------------|--------------------------------------------------------------------------------------------------|--------------------------------------------------------------------------------------------------------------------------------------------------------------------------------------------------------------------------|
| Participants:             |                                                                                                                                       |                                                                                                  |                                                                                                                                                                                                                          |
| 4a                        | Eligibility criteria for participants                                                                                                 | Eligibility criteria for clusters                                                                | See section “study design and participants”, paragraph 2.                                                                                                                                                                |
| 4b                        | Settings and locations where the data were collected                                                                                  |                                                                                                  | See section “study design and participants”, paragraph 1.<br><br>See section “Data collection”, paragraph 1                                                                                                              |
| Interventions:            |                                                                                                                                       |                                                                                                  |                                                                                                                                                                                                                          |
| 5                         | The interventions for each group with sufficient details to allow replication, including how and when they were actually administered | Whether interventions pertain to the cluster level, the individual participant level, or both    | See section “procedure”, paragraph 1.                                                                                                                                                                                    |
| Outcomes:                 |                                                                                                                                       |                                                                                                  |                                                                                                                                                                                                                          |
| 6a                        | Completely defined prespecified primary and secondary outcome measures, including how and when they were assessed                     | Whether outcome measures pertain to the cluster level, the individual participant level, or both | See section “outcomes”, “Secondary neonatal outcomes”, “Exploratory neonatal outcomes”, “Secondary maternal outcomes”, “Exploratory maternal outcome”<br><br>Section “Sample size and statistical analysis” paragraph 1. |
| 6b                        | Any changes to trial outcomes after the trial commenced, with reasons                                                                 |                                                                                                  | See section “Data collection”                                                                                                                                                                                            |
| Sample size:              |                                                                                                                                       |                                                                                                  |                                                                                                                                                                                                                          |
| 7a                        | How sample size was determined                                                                                                        | Method of calculation, number of clusters(s) (and whether equal or                               | See section “Sample size and statistical analysis”, paragraph 1                                                                                                                                                          |

| Section/topic and item No         | Standard checklist item                                                                                                                                                                     | Extension for cluster designs                                                                                                                                                               | Page No*                                                                         |
|-----------------------------------|---------------------------------------------------------------------------------------------------------------------------------------------------------------------------------------------|---------------------------------------------------------------------------------------------------------------------------------------------------------------------------------------------|----------------------------------------------------------------------------------|
|                                   |                                                                                                                                                                                             | unequal cluster sizes are assumed), cluster size, a coefficient of intracluster correlation (ICC or $k$ ), and an indication of its uncertainty                                             | See section “Randomisation and masking”                                          |
| 7b                                | When applicable, explanation of any interim analyses and stopping guidelines                                                                                                                |                                                                                                                                                                                             | See section “Procedures”, paragraph 3                                            |
| <b>Randomisation</b>              |                                                                                                                                                                                             |                                                                                                                                                                                             |                                                                                  |
| Sequence generation:              |                                                                                                                                                                                             |                                                                                                                                                                                             |                                                                                  |
| 8a                                | Method used to generate the random allocation sequence                                                                                                                                      |                                                                                                                                                                                             | See section “Randomisation and masking”                                          |
| 8b                                | Type of randomisation; details of any restriction (such as blocking and block size)                                                                                                         | Details of stratification or matching if used                                                                                                                                               | See section “Randomisation and masking”                                          |
| Allocation concealment mechanism: |                                                                                                                                                                                             |                                                                                                                                                                                             |                                                                                  |
| 9                                 | Mechanism used to implement the random allocation sequence (such as sequentially numbered containers), describing any steps taken to conceal the sequence until interventions were assigned | Specification that allocation was based on clusters rather than individuals and whether allocation concealment (if any) was at the cluster level, the individual participant level, or both | See section “Randomisation and masking”                                          |
| Implementation:                   |                                                                                                                                                                                             |                                                                                                                                                                                             |                                                                                  |
| 10                                | Who generated the random allocation sequence, who enrolled participants, and who assigned participants to interventions                                                                     | Replaced by 10a, 10b, and 10c                                                                                                                                                               | See section “Randomisation and masking”<br>See section “procedure”, paragraph 2. |

| Section/topic and item No   | Standard checklist item                                                                                                                  | Extension for cluster designs                                                                                                                                      | Page No*                                                                                            |
|-----------------------------|------------------------------------------------------------------------------------------------------------------------------------------|--------------------------------------------------------------------------------------------------------------------------------------------------------------------|-----------------------------------------------------------------------------------------------------|
| 10a                         |                                                                                                                                          | Who generated the random allocation sequence, who enrolled clusters, and who assigned clusters to interventions                                                    | See section “Randomisation and masking” and “procedure”                                             |
| 10b                         |                                                                                                                                          | Mechanism by which individual participants were included in clusters for the purposes of the trial (such as complete enumeration, random sampling)                 | See section “Study design and participants”, paragraph 2                                            |
| 10c                         |                                                                                                                                          | From whom consent was sought (representatives of the cluster, or individual cluster members, or both) and whether consent was sought before or after randomisation | See section “Study design and participants”, paragraph 4                                            |
| <b>Blinding:</b>            |                                                                                                                                          |                                                                                                                                                                    |                                                                                                     |
| 11a                         | If done, who was blinded after assignment to interventions (for example, participants, care providers, those assessing outcomes) and how |                                                                                                                                                                    | See section “Study design and participants”, paragraph 1<br>See section “Randomisation and masking” |
| 11b                         | If relevant, description of the similarity of interventions                                                                              |                                                                                                                                                                    |                                                                                                     |
| <b>Statistical methods:</b> |                                                                                                                                          |                                                                                                                                                                    |                                                                                                     |
| 12a                         | Statistical methods used to compare groups for primary and secondary outcomes                                                            | How clustering was taken into account                                                                                                                              | See section “Sample size and statistical analysis”, paragraph 2-3                                   |

| Section/topic and item No                             | Standard checklist item                                                                                                                        | Extension for cluster designs                                                                                                               | Page No*                                                             |
|-------------------------------------------------------|------------------------------------------------------------------------------------------------------------------------------------------------|---------------------------------------------------------------------------------------------------------------------------------------------|----------------------------------------------------------------------|
| 12b                                                   | Methods for additional analyses, such as subgroup analyses and adjusted analyses                                                               |                                                                                                                                             | See section “Sample size and statistical analysis”, paragraph 2-3    |
| <b>Results</b>                                        |                                                                                                                                                |                                                                                                                                             |                                                                      |
| Participant flow (a diagram is strongly recommended): |                                                                                                                                                |                                                                                                                                             |                                                                      |
| 13a                                                   | For each group, the numbers of participants who were randomly assigned, received intended treatment, and were analysed for the primary outcome | For each group, the numbers of clusters that were randomly assigned, received intended treatment, and were analysed for the primary outcome | See figure 1 and figure S1.<br>See section “results”, paragraph 1-2. |
| 13b                                                   | For each group, losses and exclusions after randomisation, together with reasons                                                               | For each group, losses and exclusions for both clusters and individual cluster members                                                      | See figure 1 and figure S1.<br>See section “results”, paragraph 1-2. |
| Recruitment:                                          |                                                                                                                                                |                                                                                                                                             |                                                                      |
| 14a                                                   | Dates defining the periods of recruitment and follow-up                                                                                        |                                                                                                                                             | See section “results”, paragraph 1                                   |
| 14b                                                   | Why the trial ended or was stopped                                                                                                             |                                                                                                                                             |                                                                      |
| Baseline data:                                        |                                                                                                                                                |                                                                                                                                             |                                                                      |
| 15                                                    | A table showing baseline demographic and clinical characteristics for each group                                                               | Baseline characteristics for the individual and cluster levels as applicable for each group                                                 | See table 1, table S12 and S16.                                      |
| Numbers analysed:                                     |                                                                                                                                                |                                                                                                                                             |                                                                      |
| 16                                                    | For each group, number of participants (denominator) included in each analysis and whether the                                                 | For each group, number of clusters included in each analysis                                                                                | See section “results”, paragraph 1-2.                                |

| Section/topic and item No | Standard checklist item                                                                                                                           | Extension for cluster designs                                                                                                                    | Page No*                           |
|---------------------------|---------------------------------------------------------------------------------------------------------------------------------------------------|--------------------------------------------------------------------------------------------------------------------------------------------------|------------------------------------|
|                           | analysis was by original assigned groups                                                                                                          |                                                                                                                                                  |                                    |
| Outcomes and estimation:  |                                                                                                                                                   |                                                                                                                                                  |                                    |
| 17a                       | For each primary and secondary outcome, results for each group, and the estimated effect size and its precision (such as 95% confidence interval) | Results at the individual or cluster level as applicable and a coefficient of intraclass correlation (ICC or <i>k</i> ) for each primary outcome | See table 2 and 3.                 |
| 17b                       | For binary outcomes, presentation of both absolute and relative effect sizes is recommended                                                       |                                                                                                                                                  | See table 2 and 3.                 |
| Ancillary analyses:       |                                                                                                                                                   |                                                                                                                                                  |                                    |
| 18                        | Results of any other analyses performed, including subgroup analyses and adjusted analyses, distinguishing prespecified from exploratory          |                                                                                                                                                  | See table 2 and 3.                 |
| Harms:                    |                                                                                                                                                   |                                                                                                                                                  |                                    |
| 19                        | All important harms or unintended effects in each group (for specific guidance see CONSORT for harms106)                                          |                                                                                                                                                  | See section “results”, paragraph 5 |
| <b>Discussion</b>         |                                                                                                                                                   |                                                                                                                                                  |                                    |
| Limitations:              |                                                                                                                                                   |                                                                                                                                                  |                                    |

| Section/topic and item No | Standard checklist item                                                                                          | Extension for cluster designs                                             | Page No*                                                          |
|---------------------------|------------------------------------------------------------------------------------------------------------------|---------------------------------------------------------------------------|-------------------------------------------------------------------|
| 20                        | Trial limitations, addressing sources of potential bias, imprecision, and, if relevant, multiplicity of analyses |                                                                           | See section “discussion”, paragraph 6                             |
| Generalisability:         |                                                                                                                  |                                                                           |                                                                   |
| 21                        | Generalisability (external validity, applicability) of the trial findings                                        | Generalisability to clusters and/or individual participants (as relevant) | See section “discussion”, paragraph 5                             |
| Interpretation:           |                                                                                                                  |                                                                           |                                                                   |
| 22                        | Interpretation consistent with results, balancing benefits and harms, and considering other relevant evidence    |                                                                           | See section “discussion”, paragraph 8<br>See section “conclusion” |
| <b>Other information</b>  |                                                                                                                  |                                                                           |                                                                   |
| Registration:             |                                                                                                                  |                                                                           |                                                                   |
| 23                        | Registration number and name of trial registry                                                                   |                                                                           | See section “Trial registration”                                  |
| Protocol:                 |                                                                                                                  |                                                                           |                                                                   |
| 24                        | Where the full trial protocol can be accessed, if available                                                      |                                                                           | See section “methods”, paragraph 1                                |
| Funding:                  |                                                                                                                  |                                                                           |                                                                   |
| 25                        | Sources of funding and other support (such as supply of drugs), role of funders                                  |                                                                           | See section “funding”                                             |

\*Page numbers optional depending on journal requirements.
