# Supplementary material for: Changing diagnostic criteria for gestational diabetes (CDC4G) in Sweden: A stepped wedge cluster randomised trial
Source: PubMed Central journal article supplement (PMC11262657; doi:10.1371/journal.pmed.1004420), 2024-07-08
Supplement: pmed.1004420.s003.pdf [file pmed.1004420.s003.pdf]

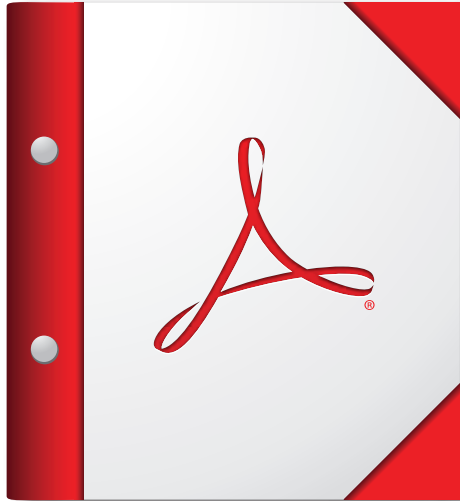

**Bästa resultat får du om du öppnar den här PDF-portföljen i Acrobat X eller Adobe Reader X eller senare.**

Hämta Adobe Reader nu!
