# Supplementary material for: Changing diagnostic criteria for gestational diabetes (CDC4G) in Sweden: A stepped wedge cluster randomised trial
Source: PubMed Central journal article supplement (PMC11262657; doi:10.1371/journal.pmed.1004420), 2024-07-08
Supplement: pmed.1004420.s006.pdf [file pmed.1004420.s006.pdf]

**S1 Table. Intention to treat population in the CDC4G study according to cluster and number of births registered at delivery unit\***

| Clusters        | Delivery units                             | Intention to treat population* | Number of births according to the medical birth register |
|-----------------|--------------------------------------------|--------------------------------|----------------------------------------------------------|
| C11 Gotland     | Visby Hospital                             | 413                            | 413                                                      |
| C10 Västerås    | Västerås Central Hospital                  | 2 666                          | 2 666                                                    |
| C9 Malmö        | Skåne University Hospital, Malmö           | 5 756                          | 5 735                                                    |
| C8 Stockholm    | Stockholm South General Hospital           | 21 672                         | 6 202                                                    |
|                 | Danderyds Hospital                         |                                | 7 818                                                    |
|                 | BB Stockholm                               |                                |                                                          |
|                 | Karolinska University Hospital, Huddinge   |                                | 3 401                                                    |
|                 | Karolinska University Hospital, Solna      |                                | 2 559                                                    |
| C7 Halland      | Södertälje Hospital                        |                                | 1 553                                                    |
|                 | Varberg Hospital                           | 2 826                          | 1 447                                                    |
|                 | Halmstad                                   |                                | 1 343                                                    |
| C6 Göteborg     | Gothenburg Sahlgrenska University Hospital | 9 305                          | 9 302                                                    |
| C5 Lund         | Skåne University Hospital, Lund            | 3 607                          | 3 589                                                    |
| C4 Kristianstad | Kristianstad Central Hospital              | 1 940                          | 1 916                                                    |
| C3 Örebro       | Örebro University hospital                 | 3 288                          | 2 826                                                    |
|                 | Karlskoga Hospital                         |                                | 434                                                      |
| C2 Uppsala      | Uppsala University Hospital                | 4 240                          | 4 240                                                    |
| C1 Dalarna      | Falun Hospital                             | 2 670                          | 2 670                                                    |
| Total**         |                                            | 58 383                         | 58 114                                                   |

\*The intention to treat population was defined according to the study protocol, according to the oral glucose tolerance test dates, or gestational week if no OGTT done at included clusters (table S6). Numbers of pregnancies in the study are not equal to number of births per cluster, as some births may have occurred at another clinic.
