# Supplementary material for: Changing diagnostic criteria for gestational diabetes (CDC4G) in Sweden: A stepped wedge cluster randomised trial
Source: PubMed Central journal article supplement (PMC11262657; doi:10.1371/journal.pmed.1004420), 2024-07-08
Supplement: pmed.1004420.s007.pdf [file pmed.1004420.s007.pdf]

**S2 Table: List of the CDC4G clusters, number of births, methods for screening and diagnosing GDM [1]**

| Cluster                   | Number of births/year <sup>a</sup> | Indication for diagnostic 75 g OGTT |                          |                  |                     |     |                 |                |                    |                                                                                                           | Diagnostic criteria prior to switch (mmol/L)           | Overt diabetes <sup>c</sup> (mmol/L) | Method for glucose analysis                                                           | Additive in blood collection tubes                |
|---------------------------|------------------------------------|-------------------------------------|--------------------------|------------------|---------------------|-----|-----------------|----------------|--------------------|-----------------------------------------------------------------------------------------------------------|--------------------------------------------------------|--------------------------------------|---------------------------------------------------------------------------------------|---------------------------------------------------|
|                           |                                    | History                             |                          |                  | Clinical indication |     |                 |                |                    |                                                                                                           |                                                        |                                      |                                                                                       |                                                   |
|                           |                                    | GDM                                 | Macro-somia <sup>b</sup> | LGA <sup>c</sup> | IUFD                | BMI | FH <sup>d</sup> | Polyhydramnios | Accel growth       | RBG                                                                                                       |                                                        |                                      |                                                                                       |                                                   |
| Gotland <sup>h</sup>      | 538                                | 24-28                               | 24-28                    | -                | -                   | ≥35 | 24-28           | Yes            | Yes                | RPG <sup>e</sup> ≥9.0 mmol/L at enrollment week 25, 29, 32/33, 37/38.                                     | FPG <7.0 and 2-h PG 8.9–11.0                           | FPG ≥7.0 and/or 2-h PG ≥11.1         | HemoCue AB<br>HemoCue 201 RT (glucose dehydrogenase)<br>No external control           | EDTA <sup>g</sup>                                 |
| Västerås <sup>i</sup>     | 3 120                              | 24-28                               | 24-28                    | 24-28            | -                   | ≥35 | -               | Yes            | Yes                | RPG <sup>e</sup> ≥9.0 mmol/L at booking week 25, 30, 35.                                                  | FPG <7.0 and 2-h PG 8.9–11.0                           | FPG ≥7.0 and/or 2-h PG ≥11.1         | Beckman Coulter Au (hexokinase)<br>Accredited method                                  | NaF, Citrate buffer, EDTA (VACUETTE® FC Mix Tube) |
| Stockholm <sup>j</sup>    | 28 602                             | T1& 24-28                           | 24-28                    | 24-28            | -                   | ≥35 | -               | Yes            | Yes                | RPG <sup>e</sup> ≥9.0 mmol/L at booking week 25, 29, 32/33, 37/38.                                        | FPG <7.0 and 2-h PG 8.9–11.1                           | FPG ≥7.0 and/or 2-h PG ≥11.2         | Roche Cobas<br>Beckman Coulter Au<br>Siemens Advia (hexokinase)<br>Accredited methods | NaF, Citrate buffer, EDTA (VACUETTE® FC Mix Tube) |
| Halland <sup>k</sup>      | 4 446                              | 12/ 24- 28                          | -                        | 24-28            | 24-28               | ≥30 | 24-28           | Yes            | Yes                | RPG <sup>e</sup> ≥8.0 mmol/L at enrollment, week 12, 28/29, 32, 37                                        | FPG <7.0 and 2-h PG 9.0–11.1                           | FPG ≥7.0 and/or 2-h PG ≥11.2         | HemoCue AB<br>HemoCue 201 RT (glucose dehydrogenase)<br>External control (lab)        | EDTA <sup>g</sup>                                 |
| Gothenburg <sup>l</sup>   | 9 550                              | 25-29                               | 25-29                    | 25-29            | -                   | ≥35 | 25-29           | Yes            | (Yes)              | Within one week if RPG <sup>e</sup> 8.0–12.1 mmol/L at first antenatal care visit, week 25, 28–29, 35–36. | FPG ≥7.0 and/or 2-h PG ≥10.0<br>RPG <sup>e</sup> ≥12.2 | Not defined                          | Nova biomedical StatStrip TM Multi-Well™ (glucose oxidase)<br>External control (lab)  | Li-heparin without gel <sup>g</sup>               |
| Örebro <sup>m</sup>       | 3 565                              | T1 & 24-28                          | 24-28                    | 24-28            | -                   | ≥35 | 24- 28/40       | Yes            | Yes- within 3 days | RPG <sup>e</sup> ≥9.0 mmol/L at booking, week 24, 28/29, 33, 37.                                          | FPG <7.0 and 2-h PG 8.9–11.0                           | FPG ≥7.0 and/or 2-h PG ≥11.1         | Siemens Advia (hexokinase)<br>Accredited method                                       | NaF, Citrate buffer, EDTA (VACUETTE® FC Mix Tube) |
| Uppsala <sup>n</sup>      | 4 200                              | 12- 14/24- 28                       | 24-28/40                 | 24- 28/40        | -                   | ≥30 | 24-28           | Yes            | Yes                | RPG <sup>e</sup> ≥8.8 mmol/L at booking week 25, 28/29, 33, 37                                            | FPG ≥7.0 and/or 2-h PG ≥10.0                           | Not defined                          | Abbott Architect (hexokinase)<br>Accredited method                                    | NaF, Citrate buffer, EDTA (VACUETTE® FC Mix Tube) |
| Dalarna <sup>o</sup>      | 3 232                              | 12- 14/24- 28                       | 24-28/40                 | 24- 28/40        | -                   | >35 | 24- 28/40       | Yes            | Yes                | RPG <sup>e</sup> ≥9.0 mmol/L at booking week 24, 28/29, 33, 37.                                           | FPG <7.0 and/or 2-h PG ≥8.9                            | FPG ≥7.0 and/or 2-h PG ≥11.1         | Siemens Advia (hexokinase)<br>Accredited method                                       | NaF, Citrate buffer, EDTA (VACUETTE® FC Mix Tube) |
| Malmö <sup>p</sup>        | 4 944                              | 10-12                               | 10-12                    | -                | -                   | ≥35 | 10-12           | Yes            | No                 | Capillary 75g OGTT week 28 in all women.                                                                  | FPG ≥7.0 and/or 2-h PG ≥9.0                            | Not defined                          | Roche Cobas (hexokinase)<br>Accredited method                                         | NaF, Citrate buffer, EDTA (VACUETTE® FC Mix Tube) |
| Lund <sup>q</sup>         | 3 703                              | 10-12                               | 10-12                    | -                | -                   | ≥35 | 10-12           | Yes            | No                 | FBG <sup>e</sup> ≥7 mmol/L and/or 2-h PG <sup>e</sup> ≥10.0                                               |                                                        |                                      |                                                                                       |                                                   |
| Kristianstad <sup>r</sup> | 2 085                              | 10-12                               | 10-12                    | -                | -                   | ≥35 | 10-12           | Yes            | No                 | mmol/L indication for a diagnostic OGTT                                                                   |                                                        |                                      |                                                                                       |                                                   |

When not otherwise stated, glucose measurement is based on venous plasma.

BMI=body mass index. FH=family history. FPG=fasting plasma glucose. IUFD=intrauterine fetal death. LGA=large for gestational age. OGTT=oral glucose tolerance test. PG=plasma glucose. RPG=random plasma glucose. SPR=Swedish Pregnancy Register. T1=trimester 1.

<sup>a</sup>Number of births per year based on data from the SPR 2017.

<sup>b</sup>Defined as birthweight ≥4 500g.

<sup>c</sup>Defined as birth weight  $\geq +2$  standard deviations above the Swedish reference curve [2].

<sup>d</sup>In Dalarna, Malmö, Lund, Kristianstad, Uppsala, Gotland, Halland defined as first degree relative with type 1 or type 2 diabetes, otherwise first degree relative with type 2 diabetes.

<sup>e</sup>Diagnosed and treated as GDM but with rapid management by specialist care unit in contrast to usual maternal healthcare.

<sup>f</sup>Based on capillary samples.

<sup>g</sup>Patient-near analysis.

<sup>h</sup>Gotland (Visby Hospital).

<sup>i</sup>Västerås (Västerås Central Hospital).

<sup>j</sup>Stockholm (Stockholm South General Hospital, Danderyds Hospital, Karolinska University Hospital, Huddinge BB Stockholm, Karolinska University Hospital, Solna, Södertälje Hospital.)

<sup>k</sup>Halland (Varberg Hospital) .

<sup>l</sup>Gothenburg (Gothenburg Sahlgrenska University Hospital).

<sup>m</sup>Örebro (Örebro University hospital, Karlskoga Hospital).

<sup>n</sup>Uppsala (Uppsala University Hospital)

<sup>o</sup>Dalarna (Falun Hospital).

<sup>p</sup>Malmö (Skåne University Hospital, Malmö).

<sup>q</sup>Lund (Skåne University Hospital, Lund).

<sup>r</sup>Kristianstad (Kristianstad Central Hospital)

1. Fadl H. Impact on pregnancy outcomes when changing diagnostic criteria for gestational diabetes in Sweden [Internet]. ISRCTN 2017 [updated 2022 Dec 19; cited 2023 Dec 19]. Available from: <https://doi.org/10.1186/ISRCTN41918550>.
2. Maršál K, Persson PH, Larsen T, Lilja H, Selbing A, Sultan B. Intrauterine growth curves based on ultrasonically estimated foetal weights. *Acta Paediatr.* 1996;85(7):843-8.
