# Supplementary material for: Changing diagnostic criteria for gestational diabetes (CDC4G) in Sweden: A stepped wedge cluster randomised trial
Source: PubMed Central journal article supplement (PMC11262657; doi:10.1371/journal.pmed.1004420), 2024-07-08
Supplement: pmed.1004420.s009.pdf [file pmed.1004420.s009.pdf]

**S4 Table. Target plasma glucose during pharmacological treatment [1]**

| Timing*            | Target for cPG (mmol/L) |
|--------------------|-------------------------|
| Fasting            | <5.3                    |
| Before other meals | <6                      |
| 1-hour after meal  | <8                      |
| Before bedtime     | <7                      |

cPG=capillary plasma glucose.

\* cPG is measured 4 times/day in lifestyle treatment group and 7 times/day in pharmacological treated group. Self-measurement of plasma glucose.

1. Fadl H. Impact on pregnancy outcomes when changing diagnostic criteria for gestational diabetes in Sweden [Internet]. ISRCTN 2017 [updated 2022 Dec 19; cited 2023 Dec 19]. Available from: <https://doi.org/10.1186/ISRCTN41918550>.
