# Supplementary material for: Changing diagnostic criteria for gestational diabetes (CDC4G) in Sweden: A stepped wedge cluster randomised trial
Source: PubMed Central journal article supplement (PMC11262657; doi:10.1371/journal.pmed.1004420), 2024-07-08
Supplement: pmed.1004420.s010.pdf [file pmed.1004420.s010.pdf]

**S5 Table. The minimal requirements on obstetric surveillance during 2018 for participating centers [1]**

| All                                         | Dietary treatment                                                                                                                                 | Metformin/insulin treatment                                                                                    |
|---------------------------------------------|---------------------------------------------------------------------------------------------------------------------------------------------------|----------------------------------------------------------------------------------------------------------------|
| Written information about diet and exercise | If plasma glucose within goal levels no other controls except ultrasound fetal weight estimation gestational week 38 for pre-delivery assessment. | Ultrasound fetal weight estimation at least 2 times, gestational week 28-32 and latest at gestational week 38. |
| Conventional maternal healthcare controls   | Induction of labor when indicated according to current guidelines at the clinic (provided that ultrasound fetal weight estimation is normal).     | Induction of labor if not delivered, at the latest gestational week 40+6.                                      |

1. Fadl H. Impact on pregnancy outcomes when changing diagnostic criteria for gestational diabetes in Sweden [Internet]. ISRCTN 2017 [updated 2022 Dec 19; cited 2023 Dec 19]. Available from: <https://doi.org/10.1186/ISRCTN41918550>.
