# Supplementary material for: Changing diagnostic criteria for gestational diabetes (CDC4G) in Sweden: A stepped wedge cluster randomised trial
Source: PubMed Central journal article supplement (PMC11262657; doi:10.1371/journal.pmed.1004420), 2024-07-08
Supplement: pmed.1004420.s011.pdf [file pmed.1004420.s011.pdf]

**S6 Table. Pregnancies included in the CDC4G trial based on gestational week, OGTT dates and GDM status**

| Pregnancies | 2017                                | Study period (2018)                     | 2019                                                      |
|-------------|-------------------------------------|-----------------------------------------|-----------------------------------------------------------|
| No OGTT     |                                     | No OGTT and $\geq 28+0$ GW <sup>†</sup> | 2018 population followed 90 days post-partum <sup>§</sup> |
| OGTT        | GDM and $\leq 23+6$ GW <sup>*</sup> | OGTT <sup>‡</sup>                       |                                                           |

GDM=gestational diabetes mellitus. GW=gestational week. OGTT=oral glucose tolerance test.

\*All pregnancies diagnosed with GDM during 2017, but not passed 23+6 gestational week 2018-01-01 are included in the OGTT population.

†All pregnancies without an OGTT from 28+0 gestational weeks on 2018-01-01 up to 2018-12-31 are included in the non- OGTT group.

‡All pregnancies with an OGTT during 2018-01-01—2018-12-31 are included in the OGTT group unless the indication for the OGTT is polyhydramnios, suspected LGA or OGTT  $\geq 36+0$  without information on indication, in which case the original group is maintained.

§Pregnancies included in the trial during the later study periods (months) will be followed until 90 days after birth. Last birth 4<sup>th</sup> of august 2019.
