# Supplementary material for: Changing diagnostic criteria for gestational diabetes (CDC4G) in Sweden: A stepped wedge cluster randomised trial
Source: PubMed Central journal article supplement (PMC11262657; doi:10.1371/journal.pmed.1004420), 2024-07-08
Supplement: pmed.1004420.s013.pdf [file pmed.1004420.s013.pdf]

**S8 Table. Comparing baseline characteristics in pregnancies with missing vs. complete potential confounding information by study groups in the modified intention to treat population**

|                                       | Modified intention to treat population      |               |                                                 |               |       |                                               |               |                                                 |               |       |
|---------------------------------------|---------------------------------------------|---------------|-------------------------------------------------|---------------|-------|-----------------------------------------------|---------------|-------------------------------------------------|---------------|-------|
|                                       | SWE-GDM criteria<br>(n=22 797)              |               |                                                 |               |       | WHO-2013<br>criteria (n=24 383)               |               |                                                 |               |       |
|                                       | Missing potential<br>confounders<br>(n=994) |               | Complete potential<br>confounders<br>(n=21 803) |               |       | Missing potential<br>confounders<br>(n=1 146) |               | Complete potential<br>confounders<br>(n=23 137) |               |       |
| <b>Maternal characteristics</b>       | n                                           |               | n                                               |               | P*    | n                                             |               | n                                               |               | P*    |
| Age at childbirth, years              | 994                                         | 31.3 (28-35)  | 21 803                                          | 31.7 (28-35)  | 0.29  | 1 146                                         | 30.8 (28-35)  | 23 137                                          | 31.3 (28-35)  | 0.026 |
| Body height at first visit, cm        | 454                                         | 167 (163-170) | 21 625                                          | 166 (162-170) | 0.23  | 575                                           | 166 (162-170) | 22 920                                          | 166 (161-170) | 0.46  |
| Body weight at first visit, kg        | 438                                         | 66 (59-74)    | 21 217                                          | 66 (59-75)    | 0.90  | 556                                           | 66 (59-75)    | 22 568                                          | 66 (59-75)    | 0.40  |
| BMI at first visit, kg/m <sup>2</sup> | 437                                         | 23.5 (22-27)  | 21 154                                          | 23.7 (21-27)  | 0.80  | 550                                           | 23.9 (22-27)  | 22 491                                          | 23.9 (22-27)  | 0.46  |
| Underweight (<18.5)                   |                                             | 14 (3.2)      |                                                 | 533 (2.5)     |       |                                               | 15 (2.7)      |                                                 | 605 (2.7)     |       |
| Normal (18.5-24.9)                    |                                             | 257 (58.8)    |                                                 | 12 448 (58.8) |       |                                               | 317 (57.6)    |                                                 | 12 840 (57.1) |       |
| Overweight (25.0-29.9)                |                                             | 107 (24.5)    |                                                 | 5 351 (25.3)  |       |                                               | 135 (24.5)    |                                                 | 5 773 (25.7)  |       |
| Obesity class I (30.0-34.9)           |                                             | 44 (10.1)     |                                                 | 1 995 (9.4)   |       |                                               | 47 (8.6)      |                                                 | 2 242 (10.0)  |       |
| Obesity class II (35.0-39.9)          |                                             | 10 (2.3)      |                                                 | 610 (2.9)     |       |                                               | 23 (4.2)      |                                                 | 737 (3.3)     |       |
| Obesity class III (≥40.0)             |                                             | 5 (1.1)       |                                                 | 217 (1.0)     |       |                                               | 13 (2.4)      |                                                 | 294 (1.3)     |       |
| Parity <sup>†</sup>                   | 994                                         |               | 21 803                                          |               | 0.018 | 1 145                                         |               | 23 137                                          |               | 0.76  |
| 0                                     |                                             | 479 (48.2)    |                                                 | 9 305 (42.7)  |       |                                               | 464 (40.5)    |                                                 | 9 425 (40.7)  |       |

|                                   |     |            |        |               |        |       |            |        |               |        |
|-----------------------------------|-----|------------|--------|---------------|--------|-------|------------|--------|---------------|--------|
| 1                                 |     | 341 (34.3) |        | 8 196 (37.6)  |        |       | 430 (37.5) |        | 8 621 (37.3)  |        |
| 2                                 |     | 123 (12.4) |        | 3 034 (13.9)  |        |       | 165 (14.4) |        | 3 425 (14.8)  |        |
| 3                                 |     | 32 (3.2)   |        | 824 (3.8)     |        |       | 60 (5.2)   |        | 1 054 (4.6)   |        |
| ≥4                                |     | 19 (1.9)   |        | 444 (2.0)     |        |       | 26 (2.3)   |        | 612 (2.6)     |        |
| Chronic hypertension <sup>‡</sup> | 994 | 7 (0.7)    | 21 803 | 157 (0.7)     | 0.95   | 1 146 | 8 (0.7)    | 23 137 | 165 (0.7)     | 0.95   |
| Smoking at first visit            | 7   |            | 21 803 |               | >0.99  | 2     |            | 23 137 |               | >0.99  |
| No                                |     | 7 (100.0)  |        | 21 087 (96.7) |        |       | 2 (100.0)  |        | 22 307 (96.4) |        |
| 1-9 cig/day                       |     | 0 (0.0)    |        | 597 (2.7)     |        |       | 0 (0.0)    |        | 668 (2.9)     |        |
| ≥10 cig/day                       |     | 0 (0.0)    |        | 119 (0.6)     |        |       | 0 (0.0)    |        | 162 (0.7)     |        |
| Swedish snuff at first visit      | 938 | 67 (7.1)   | 21 803 | 124 (0.6)     | <0.001 | 948   | 81 (8.5)   | 23 137 | 155 (0.7)     | <0.001 |
| Country of birth <sup>§</sup>     | 987 |            | 21 803 |               | <0.001 | 1 144 |            | 23 137 |               | <0.001 |
| Sweden                            |     | 782 (79.2) |        | 14 810 (67.9) |        |       | 863 (75.4) |        | 15 581 (67.3) |        |
| Europe except Sweden              |     | 69 (7.0)   |        | 2 311 (10.6)  |        |       | 109 (9.5)  |        | 2 350 (10.2)  |        |
| Middle East and North Africa      |     | 62 (6.3)   |        | 2 199 (10.1)  |        |       | 67 (5.9)   |        | 2 427 (10.5)  |        |
| North America and Caribbean       |     | 4 (0.4)    |        | 97 (0.4)      |        |       | 6 (0.5)    |        | 108 (0.5)     |        |
| South and Central America         |     | 11 (1.1)   |        | 292 (1.3)     |        |       | 11 (1.0)   |        | 277 (1.2)     |        |
| Africa                            |     | 35 (3.5)   |        | 1 221 (5.6)   |        |       | 53 (4.6)   |        | 1 509 (6.5)   |        |
| South East Asia                   |     | 5 (0.5)    |        | 285 (1.3)     |        |       | 11 (1.0)   |        | 307 (1.3)     |        |
| Western Pacific                   |     | 19 (1.9)   |        | 588 (2.7)     |        |       | 24 (2.1)   |        | 578 (2.5)     |        |
| Highest education, years          | 958 |            | 21 024 |               | <0.001 | 1 102 |            | 22 410 |               | 0.81   |
| <9 (school education)             |     | 19 (2.0)   |        | 659 (3.1)     |        |       | 35 (3.2)   |        | 823 (3.7)     |        |
| 9 (school education)              |     | 52 (5.4)   |        | 1 179 (5.6)   |        |       | 72 (6.5)   |        | 1 379 (6.1)   |        |

|                          |  |            |  |              |  |  |            |  |              |  |
|--------------------------|--|------------|--|--------------|--|--|------------|--|--------------|--|
| 10-11 (school education) |  | 37 (3.9)   |  | 1 493 (7.1)  |  |  | 72 (6.5)   |  | 1 616 (7.2)  |  |
| 12 (school education)    |  | 249 (26.0) |  | 4 922 (23.4) |  |  | 298 (27.0) |  | 5 682 (25.3) |  |
| <3 (college/university)  |  | 171 (17.8) |  | 3 284 (15.6) |  |  | 161 (14.6) |  | 3 337 (14.9) |  |
| ≥3 (college/university)  |  | 423 (44.1) |  | 9 255 (44.0) |  |  | 450 (40.8) |  | 9 296 (41.5) |  |
| Doctor/licentiate degree |  | 7 (0.7)    |  | 232 (1.1)    |  |  | 14 (1.3)   |  | 277 (1.2)    |  |

Data are n (%) or median (IQR) unless stated otherwise.

\*P is calculated with t-test for continuous variables and chi-2 test for categorical variables.
