# Supplementary material for: Changing diagnostic criteria for gestational diabetes (CDC4G) in Sweden: A stepped wedge cluster randomised trial
Source: PubMed Central journal article supplement (PMC11262657; doi:10.1371/journal.pmed.1004420), 2024-07-08
Supplement: pmed.1004420.s016.pdf [file pmed.1004420.s016.pdf]

**S11 Table. Pre-specified secondary maternal outcomes in the modified intention to treat population and subgroup discordant for definition GDM**

|                                                                   | Modified intention to treat population |                                    |                                           |                                           | Subgroup discordant for definition of GDM* |                                   |                                           |                                           |
|-------------------------------------------------------------------|----------------------------------------|------------------------------------|-------------------------------------------|-------------------------------------------|--------------------------------------------|-----------------------------------|-------------------------------------------|-------------------------------------------|
|                                                                   | SWE-GDM<br>Criteria<br>(n=22 797)      | WHO-2013<br>criteria<br>(n=24 283) | WHO-2013 vs SWE-GDM                       |                                           | SWE-GDM<br>criteria<br>(n=956)             | WHO-2013<br>criteria<br>(n=1 239) | WHO-2013 vs SWE-GDM                       |                                           |
|                                                                   |                                        |                                    | Adjusted 1 <sup>†</sup><br>RR (95% CI)    | Adjusted 2 <sup>‡</sup><br>RR (95% CI)    |                                            |                                   | Adjusted 1 <sup>†</sup><br>RR (95% CI)    | Adjusted 2 <sup>‡</sup><br>RR (95% CI)    |
| Induction of labour                                               | 4 587 (20.1)                           | 4 853 (20.0)                       | 0.96 (0.91-0.99)<br>P <sup>†</sup> =0.042 | 0.96 (0.92-1.00)<br>P <sup>‡</sup> =0.060 | 306 (32.0)                                 | 446 (36.0)                        | 0.97 (0.80-1.18)<br>P <sup>†</sup> =0.79  | 1.01 (0.82-1.24)<br>P <sup>‡</sup> =0.92  |
| Hospital stay (days) <sup>§</sup>                                 | 2.52 (1.68)                            | 2.45 (1.83)                        | 0.99 (0.97-1.02)<br>P <sup>†</sup> =0.74  | 0.99 (0.96-1.03)<br>P <sup>‡</sup> =0.76  | 2.77 (1.76)                                | 3.06 (2.04)                       | 1.04 (0.95-1.15)<br>P <sup>†</sup> =0.34  | 1.05 (0.93-1.18)<br>P=0.40                |
| Breastfeeding at hospital discharge <sup>¶</sup>                  |                                        |                                    |                                           |                                           |                                            |                                   |                                           |                                           |
| No                                                                | 842 (4.4)                              | 867 (4.6)                          | 1.38 (1.17-1.64)<br>P <sup>†</sup> <0.001 | 1.34 (1.13-1.58)<br>P <sup>‡</sup> <0.001 | 39 (5.7)                                   | 58 (6.5)                          | 2.41 (1.23-4.75)<br>P <sup>†</sup> =0.011 | 2.59 (1.32-5.08)<br>P <sup>‡</sup> =0.006 |
| Partly                                                            | 3 494 (18.2)                           | 3 252 (17.3)                       | 1.02 (0.93-1.13)<br>P <sup>†</sup> =0.66  | 0.98 (0.89-1.08)                          | 204 (29.7)                                 | 330 (36.8)                        | 1.73 (1.16-2.57)<br>P <sup>†</sup> =0.007 | 1.67 (1.11-2.51)<br>P <sup>‡</sup> =0.013 |
| Fully                                                             | 14 870 (77.4)                          | 14 630 (78.0)                      | Reference                                 | Reference                                 | 444 (64.6)                                 | 509 (56.7)                        | Reference                                 | Reference                                 |
| Breastfeeding at hospital discharge <sup>¶</sup> MI for outcome   |                                        |                                    |                                           |                                           |                                            |                                   |                                           |                                           |
| No                                                                |                                        |                                    | 1.56 (1.27-1.90)<br>P <sup>†</sup> <0.001 | 1.43 (1.18-1.94)<br>P <sup>‡</sup> <0.001 |                                            |                                   | 2.14 (1.07-4.26)<br>P <sup>†</sup> =0.031 | 2.21 (1.11-4.41)<br>P <sup>‡</sup> =0.024 |
| Partly                                                            |                                        |                                    | 0.96 (0.85-1.08)<br>P <sup>†</sup> =0.50  | 0.97 (0.86-1.09)<br>P <sup>‡</sup> =0.59  |                                            |                                   | 1.35 (0.94-1.95)<br>P <sup>†</sup> =0.11  | 1.33 (0.91-1.94)<br>P <sup>‡</sup> =0.14  |
| Fully                                                             |                                        |                                    | Reference                                 | Reference                                 |                                            |                                   | Reference                                 | Reference                                 |
| Self-reported health during pregnancy**                           |                                        |                                    |                                           |                                           |                                            |                                   |                                           |                                           |
| Very good / good                                                  | 11 913 (79.1)                          | 11 711 (77.6)                      | Reference                                 | Reference                                 | 411 (75.3)                                 | 470 (67.2)                        | Reference                                 | Reference                                 |
| Neither good nor bad                                              | 1 899 (12.6)                           | 2 006 (13.3)                       | 1.02 (0.91-1.15)<br>P <sup>†</sup> =0.67  | 1.02 (0.91-1.15)<br>P <sup>‡</sup> =0.67  | 83 (15.2)                                  | 131 (18.7)                        | 1.34 (0.89-2.01)<br>P <sup>†</sup> =0.16  | 1.36 (0.90-2.05)<br>P <sup>‡</sup> =0.14  |
| Bad / very bad                                                    | 1 246 (8.3)                            | 1 382 (9.1)                        | 1.07 (0.94-1.22)<br>P <sup>†</sup> =0.31  | 1.08 (0.94-1.23)<br>P <sup>‡</sup> =0.26  | 52 (9.5)                                   | 98 (14.0)                         | 1.67 (1.04-2.69)<br>P <sup>†</sup> =0.033 | 1.81 (1.11-2.94)<br>P <sup>‡</sup> =0.016 |
| Self-reported health during pregnancy** MI for outcome            |                                        |                                    |                                           |                                           |                                            |                                   |                                           |                                           |
| Very good / good                                                  |                                        |                                    | Reference                                 | Reference                                 |                                            |                                   | Reference                                 | Reference                                 |
| Neither good nor bad                                              |                                        |                                    | 0.99 (0.86-1.14)<br>P <sup>†</sup> =0.92  | 1.00 (0.87-1.15)<br>P <sup>‡</sup> =0.98  |                                            |                                   | 1.25 (0.87-1.79)<br>P <sup>†</sup> =0.23  | 1.25 (0.86-1.81)<br>P <sup>‡</sup> =0.24  |
| Bad / very bad                                                    |                                        |                                    | 1.04 (0.91-1.20)<br>P <sup>†</sup> =0.52  | 1.05 (0.91-1.20)<br>P <sup>‡</sup> =0.51  |                                            |                                   | 1.41 (0.92-2.16)<br>P <sup>†</sup> =0.11  | 1.47 (0.96-2.27)<br>P <sup>‡</sup> =0.078 |
| Self-reported health after pregnancy <sup>††</sup>                |                                        |                                    |                                           |                                           |                                            |                                   |                                           |                                           |
| Very good / good                                                  | 14 089 (91.4)                          | 14 169 (90.5)                      | Reference                                 | Reference                                 | 495 (88.2)                                 | 644 (87.9)                        | Reference                                 | Reference                                 |
| Neither good nor bad                                              | 952 (6.2)                              | 1 068 (6.8)                        | 1.02 (0.87-1.18)<br>P <sup>†</sup> =0.85  | 1.01 (0.86-1.18)<br>P <sup>‡</sup> =0.91  | 43 (7.7)                                   | 58 (7.9)                          | 0.95 (0.55-1.66)<br>P <sup>†</sup> =0.87  | 0.99 (0.56-1.75)<br>P <sup>‡</sup> =0.98  |
| Bad / very bad                                                    | 368 (2.4)                              | 412 (2.6)                          | 0.85 (0.68-1.06)<br>P <sup>†</sup> =0.15  | 0.84 (0.67-1.05)<br>P <sup>‡</sup> =0.13  | 23 (4.1)                                   | 31 (4.2)                          | 1.16 (0.57-2.34)<br>P <sup>†</sup> =0.68  | 1.14 (0.56-2.33)<br>P <sup>‡</sup> =0.71  |
| Self-reported health after pregnancy <sup>††</sup> MI for outcome |                                        |                                    |                                           |                                           |                                            |                                   |                                           |                                           |
| Very good / good                                                  |                                        |                                    | Reference                                 | Reference                                 |                                            |                                   | Reference                                 | Reference                                 |

|                                                           |               |               |                                          |                                          |            |            |                                          |                            |
|-----------------------------------------------------------|---------------|---------------|------------------------------------------|------------------------------------------|------------|------------|------------------------------------------|----------------------------|
| Neither good nor bad                                      |               |               | 1.03 (0.88-1.20)<br>P <sup>†</sup> =0.70 | 1.02 (0.88-1.20)<br>P <sup>†</sup> =0.76 |            |            | 0.95 (0.57-1.57)<br>P <sup>†</sup> =0.83 | 0.99 (0.59-1.65)<br>P=0.96 |
| Bad / very bad                                            |               |               | 0.84 (0.65-1.07)<br>P <sup>†</sup> =0.16 | 0.84 (0.65-1.07)<br>P <sup>†</sup> =0.16 |            |            | 0.98 (0.52-1.86)<br>P <sup>†</sup> =0.96 | 0.98 (0.51-1.88)<br>P=0.96 |
| Satisfaction with childbirth <sup>§§</sup>                |               |               |                                          |                                          |            |            |                                          |                            |
| Moderate / high (score 5-10)                              | 13 311 (95.0) | 12 950 (94.9) | Reference                                | Reference                                | 449 (94.1) | 555 (94.1) | Reference                                | Reference                  |
| Low (score 1-4)                                           | 699 (5.0)     | 699 (5.1)     | 1.00 (0.82-1.21)<br>P <sup>†</sup> =0.98 | 0.99 (0.82-1.20)<br>P <sup>†</sup> =0.93 | 28 (5.9)   | 35 (5.9)   | 1.51 (0.82-2.77)<br>P <sup>†</sup> =0.18 | 1.53 (0.80-2.92)<br>P=0.20 |
| Satisfaction with childbirth <sup>§§</sup> MI for outcome |               |               |                                          |                                          |            |            |                                          |                            |
| Moderate / high (score 5-10)                              |               |               | Reference                                | Reference                                |            |            | Reference                                | Reference                  |
| Low (score 1-4)                                           |               |               | 0.94 (0.78-1.13)<br>P <sup>†</sup> =0.53 | 0.95 (0.79-1.13)<br>P <sup>†</sup> =0.56 |            |            | 1.07 (0.55-2.09)<br>P <sup>†</sup> =0.84 | 1.12 (0.56-2.27)<br>P=0.74 |

Data are n (%) or mean (SD).

RR=relative risk ratio. CI=confidence interval. GDM=gestational diabetes mellitus. MI= multiple imputation. NA=not applicable.

\*The cohort of women with fasting and 2-hour plasma glucose cut off between the WHO-2013 criteria and SWE-GDM criteria (fasting plasma glucose 5.1-6.9 and/or 2-hour plasma glucose 8.5-8.8/8.9/9.9 mmol/L), untreated before and treated after the switch).

<sup>†</sup>Analysed with multilevel mixed model adjusted for centre as random factor and period (January-March, April-June, July-September, October-December) as fixed factor. Mixed Poisson model for binary outcomes (gives relative risk ratios for relative risk associations), mixed multi-nominal for categorical outcomes (gives odds ratios as association measures), mixed linear model for continuous outcomes (gives mean differences as association measures), and mixed negative binomial model for count data (gives mean ratios as association measures).

<sup>‡</sup>Adjusted for mother's age modelled by a linear, squared, and cubic term, chronic hypertension, smoking, snuff, country of birth, and parity. Multiple imputation used for missing data on potential confounding variables.

<sup>§</sup> From delivery to discharge. In the modified intention to treat population there were missing values for 4 women in the SWE-GDM group and for 4 in the WHO-2013 group

<sup>¶</sup> In the modified intention to treat population there were missing values for 3 591 (15.7%) women in the SWE-GDM group and for 5 534 (22.8%) in the WHO-2013 group. In the subgroup there were missing values for 269 (28.1%) women in the SWE-GDM group and for 342 (27.6%) in the WHO-2013 group.

<sup>\*\*</sup> In the modified intention to treat population there were missing values for 7 739 (33.9%) women in the SWE-GDM group and for 9 184 (37.8%) in the WHO-2013 group. In the subgroup there were missing values for 410 (42.9) women in the SWE-GDM group and for 540 (43.6%) in the WHO-2013 group

<sup>††</sup> In the modified intention to treat population there were missing values for 7 388 (32.4%) women in the SWE-GDM group and for 8 634 (35.6%) in the WHO-2013 group. In the subgroup there were missing values for 395 (41.3%) women in the SWE-GDM group and for 506 (40.8%) in the WHO-2013 group.

<sup>§§</sup> In the modified intention to treat population there were missing values for 8 787 women (38.5%) in the SWE-GDM group and for 10 634 (43.8%) in the WHO-2013 group. In the subgroup there were missing values for 479 (50.1%) women in the SWE-GDM group and for 649 (52.4%) in the WHO-2013 group.
