# Supplementary material for: Changing diagnostic criteria for gestational diabetes (CDC4G) in Sweden: A stepped wedge cluster randomised trial
Source: PubMed Central journal article supplement (PMC11262657; doi:10.1371/journal.pmed.1004420), 2024-07-08
Supplement: pmed.1004420.s017.pdf [file pmed.1004420.s017.pdf]

|                          |        |               |        |               |     |            |       |            |
|--------------------------|--------|---------------|--------|---------------|-----|------------|-------|------------|
| Fasting                  | 3 085  | 5.0 (0.8)     | 3 436  | 5.0 (0.7)     | 956 | 5.4 (0.4)  | 1 195 | 5.5 (0.5)  |
| 1-hour                   | 80     | 8.0 (2.1)     | 3 027  | 8.2 (2.0)     | 21  | 7.8 (1.4)  | 1 081 | 9.3 (1.8)  |
| 2-hour                   | 3 040  | 7.1 (2.0)     | 3 371  | 7.0 (1.8)     | 945 | 7.1 (1.3)  | 1 168 | 7.9 (1.8)  |
| HbA1c in GDM group       | 288    | 37.6 (6.6)    | 694    | 34.7 (4.9)    | 0   | NA         | 597   | 34.4 (4.2) |
| Neonatal characteristics | 22 698 |               | 21 838 |               | 951 |            | 1 194 |            |
| Boy                      |        | 11 642 (51.3) |        | 11 099 (50.8) |     | 493 (51.8) |       | 610 (51.1) |
| Girl                     |        | 11 056 (48.7) |        | 10 739 (49.2) |     | 458 (48.2) |       | 584 (48.9) |

Data are n (%) or mean (SD) unless stated otherwise.

BMI=body mass index. GDM=gestational diabetes mellitus. OGTT= oral glucose tolerance test

\*The cohort of women with fasting and 2-hour plasma glucose cut off between the WHO-2013 criteria and SWE-GDM criteria (fasting plasma glucose 5.1-6.9 and/or 2-hour plasma glucose 8.5-8.8/8.9/9.9) mmol/L), untreated before and treated after the switch.

†Numbers of previous deliveries; stillbirths or live births.

‡Hypertension before pregnancy or new onset hypertension with blood pressure  $\geq 140/90$  mmHg before gestational week 20.

§Grouped according to International Diabetes Federation Atlas except for having an extra category for Sweden [1].

1. International Diabetes Federation. IDF Diabetes Atlas [Internet]. 2021 [cited 2023 Apr 02]. 10th:[Available from: [www.diabetesatlas.org](http://www.diabetesatlas.org)].
