# Supplementary material for: Changing diagnostic criteria for gestational diabetes (CDC4G) in Sweden: A stepped wedge cluster randomised trial
Source: PubMed Central journal article supplement (PMC11262657; doi:10.1371/journal.pmed.1004420), 2024-07-08
Supplement: pmed.1004420.s018.pdf [file pmed.1004420.s018.pdf]

**S13 Table. Primary and pre-specified neonatal outcomes in the modified per protocol population and subgroup discordant for definition of GDM**

|                                                                 | Modified per protocol population |              |                              |              |                                           |                                           | Subgroup discordant for definition of GDM* |            |                             |            |                                           |                                           |
|-----------------------------------------------------------------|----------------------------------|--------------|------------------------------|--------------|-------------------------------------------|-------------------------------------------|--------------------------------------------|------------|-----------------------------|------------|-------------------------------------------|-------------------------------------------|
|                                                                 | SWE-GDM criteria (n=22 757)      |              | WHO-2013 criteria (n=21 886) |              | WHO-2013 vs SWE-GDM                       |                                           | SWE-GDM criteria (n=956)                   |            | WHO-2013 criteria (n=1 195) |            | WHO-2013 vs SWE-GDM                       |                                           |
|                                                                 |                                  |              |                              |              | Adjusted 1 <sup>†</sup> RR (95% CI)       | Adjusted 2 MI <sup>‡</sup> RR (95% CI)    |                                            |            |                             |            | Adjusted 1 <sup>†</sup> RR (95% CI)       | Adjusted 2 MI <sup>‡</sup> RR (95% CI)    |
| <b>Primary outcome</b>                                          |                                  |              |                              |              |                                           |                                           |                                            |            |                             |            |                                           |                                           |
| Large for gestational age (>90 <sup>th</sup> percentile) [1]    | 22 668                           | 2 573 (11.4) | 21 820                       | 2 496 (11.3) | 0.96 (0.91-1.01)<br>P <sup>†</sup> =0.13  | 0.96 (0.90-1.03)<br>P <sup>‡</sup> =0.29  | 947                                        | 273 (28.8) | 1 193                       | 273 (22.9) | 0.81 (0.69-0.94)<br>P <sup>†</sup> =0.007 | 0.84 (0.70-1.01)<br>P <sup>‡</sup> =0.059 |
| <b>Secondary outcome</b>                                        |                                  |              |                              |              |                                           |                                           |                                            |            |                             |            |                                           |                                           |
| Composite neonatal outcome                                      | 22 757                           | 288 (1.3)    | 21 996                       | 322 (1.5)    | 1.11 (0.97-1.27)<br>P <sup>†</sup> =0.12  | 1.15 (0.98-1.35)<br>P <sup>‡</sup> =0.094 | 956                                        | 15 (1.6)   | 1 195                       | 13 (1.1)   | 0.18 (0.08-0.39)<br>P <sup>†</sup> <0.001 | NA                                        |
| Respiratory distress                                            | 22 757                           | 148 (0.65)   | 21 886                       | 173 (0.79)   | 1.32 (1.04-1.69)<br>P <sup>†</sup> =0.023 | 1.41 (1.06-1.86)<br>P <sup>‡</sup> =0.016 | 956                                        | 6 (0.63)   | 1 195                       | 6 (0.50)   | NA                                        | NA                                        |
| Spinal cord injury                                              | 22 757                           | 0 (0.00)     | 21 886                       | 2 (0.01)     | NA                                        | NA                                        | 956                                        | 0 (0.00)   | 1 195                       | 0 (0.00)   | NA                                        | NA                                        |
| Peripheral nerve/ brachial plexus injury                        | 22 757                           | 16 (0.07)    | 21 886                       | 21 (0.10)    | 1.18 (0.66-2.10)<br>P <sup>†</sup> =0.57  | NA                                        | 956                                        | 1 (0.10)   | 1 195                       | 2 (0.17)   | NA                                        | NA                                        |
| Basal/depressed skull fracture                                  | 22 757                           | 0 (0.0)      | 21 886                       | 0 (0.0)      | NA                                        | NA                                        | 956                                        | 0 (0.0)    | 1 195                       | 0 (0.0)    | NA                                        | NA                                        |
| Clavicular fracture                                             | 22 757                           | 31 (0.14)    | 21 886                       | 34 (0.16)    | 0.73 (0.35-1.53)<br>P <sup>†</sup> =0.40  | 0.74 (0.34-1.56)<br>P <sup>‡</sup> =0.43  | 956                                        | 2 (0.21)   | 1 195                       | 1 (0.08)   | NA                                        | NA                                        |
| Long bone fracture                                              | 22 757                           | 3 (0.01)     | 21 886                       | 0 (0.00)     | NA                                        | NA                                        | 956                                        | 0 (0.0)    | 1 195                       | 0 (0.0)    | NA                                        | NA                                        |
| Cranial haemorrhage                                             | 22 757                           | 37 (0.16)    | 21 886                       | 50 (0.23)    | 1.63 (1.24-2.15)<br>P <sup>†</sup> <0.001 | 1.71 (1.26-2.32)<br>P <sup>‡</sup> <0.001 | 956                                        | 1 (0.10)   | 1 195                       | 0 (0.0)    | NA                                        | NA                                        |
| Stillbirth (≥22 gestational weeks) or neonatal death (day 0-28) | 22 757                           | 69 (0.30)    | 21 886                       | 69 (0.32)    | 0.80 (0.55-1.14)<br>P <sup>†</sup> =0.22  | 0.79 (0.56-1.11)<br>P <sup>‡</sup> =0.17  | 956                                        | 5 (0.52)   | 1 195                       | 1 (0.08)   | NA                                        | NA                                        |
| Need of therapeutic cooling                                     | 22 757                           | 20 (0.09)    | 21 886                       | 29 (0.13)    | 1.33 (0.17-10.6)<br>P <sup>†</sup> =0.79  | NA                                        | 956                                        | 0 (0.0)    | 1 195                       | 4 (0.33)   | NA                                        | NA                                        |
| Preterm birth (<37 weeks)                                       | 22 757                           | 941 (4.1)    | 21 886                       | 1 031 (4.7)  | 1.08 (0.95-1.21)<br>P <sup>†</sup> =0.23  | 1.09 (0.95-1.25)<br>P <sup>‡</sup> =0.22  | 956                                        | 39 (4.1)   | 1 195                       | 73 (6.1)   | 1.19 (0.70-2.03)<br>P <sup>†</sup> =0.51  | 1.28 (0.72-2.27)<br>P <sup>‡</sup> =0.40  |
| Small for gestational age (<10 <sup>th</sup> percentile) [1]    | 22 668                           | 2 519 (11.1) | 21 820                       | 2 453 (11.2) | 0.98 (0.91-1.05)<br>P <sup>†</sup> =0.58  | 0.98 (0.90-1.08)<br>P <sup>‡</sup> =0.72  | 947                                        | 56 (5.9)   | 1 193                       | 98 (8.2)   | 1.12 (0.88-1.43)<br>P <sup>†</sup> =0.35  | 1.13 (0.81-1.57)<br>P <sup>‡</sup> =0.47  |
| NICU >24h                                                       | 22 757                           | 1 334 (5.9)  | 21 886                       | 1 538 (7.0)  | 1.00 (0.89-1.12)<br>P <sup>†</sup> =0.97  | 1.00 (0.88-1.14)<br>P <sup>‡</sup> =0.98  | 956                                        | 63 (6.6)   | 1 195                       | 100 (8.4)  | 0.76 (0.42-1.37)<br>P <sup>†</sup> =0.36  | 0.80 (0.45-1.41)<br>P <sup>‡</sup> =0.45  |
| Metabolic acidosis <sup>§</sup>                                 | 22 757                           | 116 (0.51)   | 21 886                       | 103 (0.47)   | 0.81 (0.55-1.20)<br>P <sup>†</sup> =0.30  | 0.82 (0.55-1.21)<br>P <sup>‡</sup> =0.31  | 956                                        | 6 (0.63)   | 1 195                       | 9 (0.75)   | NA                                        | NA                                        |
| 5 min Apgar score <4                                            | 22 757                           | 53 (0.23)    | 21 886                       | 81 (0.37)    | 1.57 (1.06-2.32)<br>P <sup>†</sup> =0.023 | 1.58 (1.08-2.30)<br>P <sup>‡</sup> =0.017 | 956                                        | 1 (0.10)   | 1 195                       | 4 (0.33)   | NA                                        | NA                                        |
| Hypoxic ischaemic encephalopathy II-III                         | 22 757                           | 23 (0.10)    | 21 886                       | 26 (0.12)    | 0.95 (0.40-2.25)<br>P <sup>†</sup> =0.90  | NA                                        | 956                                        | 0 (0.0)    | 1 195                       | 3 (0.25)   | NA                                        | NA                                        |
| Meconium aspiration syndrome                                    | 22 757                           | 29 (0.13)    | 21 886                       | 35 (0.16)    | 1.36 (0.72-2.58)<br>P <sup>†</sup> =0.35  | NA                                        | 956                                        | 1 (0.10)   | 1 195                       | 2 (0.17)   | NA                                        | NA                                        |
| Mechanical ventilation                                          | 22 757                           | 138 (0.61)   | 21 886                       | 164 (0.75)   | 1.30 (1.03-1.64)<br>P <sup>†</sup> =0.025 | 1.38 (1.04-1.83)<br>P <sup>‡</sup> =0.026 | 956                                        | 4 (0.42)   | 1 195                       | 6 (0.50)   | NA                                        | NA                                        |
| Plasma glucose in infants <2.6 (mmol/L)                         | 22 757                           | 681 (3.0)    | 21 886                       | 844 (3.9)    | 1.11 (0.89-1.38)<br>P <sup>†</sup> =0.36  | 1.12 (0.89-1.41)<br>P <sup>‡</sup> =0.33  | 956                                        | 59 (6.2)   | 1 195                       | 242 (20.2) | 2.95 (1.90-4.57)<br>P <sup>†</sup> <0.001 | 3.00 (1.99-4.55)<br>P <sup>‡</sup> <0.001 |
| Hypoglycaemia needing intravenous therapy                       | 22 757                           | 62 (0.27)    | 21 886                       | 63 (0.29)    | 0.87 (0.53-1.41)<br>P <sup>†</sup> =0.57  | 0.88 (0.56-1.38)<br>P <sup>‡</sup> =0.58  | 956                                        | 7 (0.73)   | 1 195                       | 15 (1.3)   | 1.54 (0.58-4.05)<br>P <sup>†</sup> =0.38  | NA                                        |

| <b>Exploratory outcomes</b>           |        |              |        |              |                                                    |                                                 |     |              |       |              |                                                 |                                                 |
|---------------------------------------|--------|--------------|--------|--------------|----------------------------------------------------|-------------------------------------------------|-----|--------------|-------|--------------|-------------------------------------------------|-------------------------------------------------|
| Macrosomia (birthweight $\geq$ 4500g) | 22 668 | 677 (3.0)    | 21 820 | 565 (2.6)    | 0.79 (0.74-0.85)<br>P <sup>†</sup> <0.001          | 0.79 (0.72-0.87)<br>P <sup>†</sup> <0.001       | 947 | 86 (9.1)     | 1 193 | 45 (3.8)     | 0.32 (0.19-0.53)<br>P <sup>†</sup> <0.001       | 0.33 (0.20-0.54)<br>P <sup>†</sup> <0.001       |
| Large for gestational age (>2 SD) [1] | 22 668 | 1 016 (4.5)  | 21 820 | 947 (4.3)    | 0.89 (0.81-0.98)<br>P <sup>†</sup> =0.018          | 0.90 (0.81-0.99)<br>P <sup>†</sup> =0.031       | 947 | 157 (16.6)   | 1 193 | 138 (11.6)   | 0.73 (0.53-0.99)<br>P <sup>†</sup> =0.049       | 0.78 (0.63-0.98)<br>P <sup>†</sup> =0.032       |
| Small for gestational age (<2 SD) [1] | 22 668 | 658 (2.9)    | 21 820 | 699 (3.2)    | 1.02 (0.85-1.23)<br>P <sup>†</sup> =0.83           | 1.01 (0.83-1.23)<br>P <sup>†</sup> =0.92        | 947 | 9 (0.95)     | 1 193 | 33 (2.8)     | 1.40 (0.75-2.62)<br>P <sup>†</sup> =0.30        | 1.50 (0.70-3.24)<br>P <sup>†</sup> =0.30        |
| Birth length (cm)                     | 22 590 | 50.3 (2.4)   | 21 744 | 50.2 (2.4)   | -0.08 (-0.14 to -0.02)<br>P <sup>†</sup> =0.012    | -0.06 (-0.12 to 0.01)<br>P <sup>†</sup> =0.10   | 944 | 50.9 (2.2)   | 1 191 | 50.3 (2.4)   | -0.28 (-0.47 to -0.09)<br>P <sup>†</sup> =0.004 | -0.30 (-0.42 to -0.18)<br>P <sup>†</sup> <0.001 |
| Birthweight (g)                       | 22 668 | 3528 (530)   | 21 820 | 3510 (538)   | -22 (-35 to -10)<br>P <sup>†</sup> <0.001          | -21 (-38 to -4)<br>P <sup>†</sup> =0.014        | 947 | 3 761 (552)  | 1 193 | 3 578 (560)  | -144 (-193 to -95)<br>P <sup>†</sup> <0.001     | -141 (-196 to -86)<br>P <sup>†</sup> <0.001     |
| Gestational age (days)                | 22 757 | 278.1 (12.1) | 21 886 | 277.6 (12.5) | -0.44<br>(-0.61 to -0.28)<br>P <sup>†</sup> <0.001 | -0.43 (-0.64 to -0.22)<br>P <sup>†</sup> <0.001 | 956 | 277.4 (10.7) | 1 195 | 274.8 (11.1) | -1.48 (-2.35 to -0.62)<br>P <sup>†</sup> <0.001 | -1.56 (-2.44 to -0.67)<br>P <sup>†</sup> <0.001 |

Data are n (%) or mean (SD). Effect measures as relative risk for binary variables or mean differences for continuous variables (95% CI).

CI=confidence interval. GDM=gestational diabetes mellitus. MI=multiple imputation. NA=not applicable. NICU=neonatal intensive care unit. RR=relative risk ratio. SD= standard deviation

\*The cohort of women with fasting and 2-hour plasma glucose cut off between the WHO-2013 criteria and SWE-GDM criteria (fasting plasma glucose 5.1-6.9 and/or 2-hour plasma glucose 8.5-8.8/8.9/9.9 mmol/L), untreated before and treated after the switch.

<sup>†</sup>Analysed with multilevel mixed model adjusted for centre as random factor and period (January-March, April-June, July-September, October-December) as fixed factor. Mixed Poisson model for binary outcomes (gives relative risk ratios for relative risk associations), mixed multi-nominal for categorical outcomes (gives odds ratios as association measures), mixed linear model for continuous outcomes (gives mean differences as association measures), and mixed negative binomial model for count data (gives mean ratios as association measures).

<sup>‡</sup>Adjusted for mother's age modeled by a linear, squared, and cubic term, chronic hypertension, smoking, snuff, country of birth, and parity. Multiple imputation used for missing data on potential confounding variables.

<sup>§</sup>pH <7.05 and base excess >12 mmol/L in umbilical artery or pH <7.00 in umbilical artery.

1. Maršál K, Persson PH, Larsen T, Lilja H, Selbing A, Sultan B. Intrauterine growth curves based on ultrasonically estimated foetal weights. *Acta Paediatr.* 1996;85(7):843-8.
