# Supplementary material for: Changing diagnostic criteria for gestational diabetes (CDC4G) in Sweden: A stepped wedge cluster randomised trial
Source: PubMed Central journal article supplement (PMC11262657; doi:10.1371/journal.pmed.1004420), 2024-07-08
Supplement: pmed.1004420.s020.pdf [file pmed.1004420.s020.pdf]

**S15 Table. Primary outcome in the modified per protocol population and subgroup discordant for definition of GDM by period and cluster**

|                         | Per protocol population     |                  |                              |                  |                           | Subgroup discordant for definition of GDM* |                  |                             |                  |                           |
|-------------------------|-----------------------------|------------------|------------------------------|------------------|---------------------------|--------------------------------------------|------------------|-----------------------------|------------------|---------------------------|
|                         | SWE-GDM criteria (n=22 757) |                  | WHO-2013 criteria (n=21 886) |                  | WHO-2013 vs SWE-GDM       | SWE-GDM criteria (n=956)                   |                  | WHO-2013 criteria (n=1 195) |                  | WHO-2013 vs SWE-GDM       |
|                         | n                           | LGA <sup>‡</sup> | n                            | LGA <sup>‡</sup> | RR (95% CI) <sup>†</sup>  | n                                          | LGA <sup>‡</sup> | n                           | LGA <sup>‡</sup> | RR (95% CI) <sup>†</sup>  |
|                         | 22<br>668                   | 2 573<br>(11.35) | 21<br>820                    | 2 496<br>(11.44) | 0.96 (0.91-1.01)          | 947                                        | 273<br>(28.8)    | 1<br>193                    | 273<br>(22.9)    | 0.81 (0.69-0.94)          |
| By period               |                             |                  |                              |                  | RR (95% CI) <sup>§</sup>  |                                            |                  |                             |                  | RR (95% CI) <sup>§</sup>  |
| <b>Jan 1 to June 30</b> |                             |                  |                              |                  | 0.95 (0.89-1.02)          |                                            |                  |                             |                  | 0.85 (0.70-1.02)          |
| <b>July 1 to Dec 31</b> |                             |                  |                              |                  | 0.97 (0.91-1.04)          |                                            |                  |                             |                  | 0.73 (0.60-0.89)          |
| By cluster              | n                           |                  | n                            |                  | RR (95% CI) <sup>**</sup> | n                                          |                  | n                           |                  | RR (95% CI) <sup>**</sup> |
| <b>Dalarna, C1</b>      | 264                         | 38 (14.4)        | 2 385                        | 363 (15.2)       | 1.06 (0.78-1.44)          | 10                                         | 2 (20.0)         | 167                         | 43<br>(25.7)     | 1.29 (0.36-4.58)          |
| <b>Uppsala, C2</b>      | 705                         | 86 (12.2)        | 1 173                        | 136 (11.6)       | 0.95 (0.74-1.22)          | 52                                         | 8 (15.4)         | 108                         | 19<br>(17.6)     | 1.14 (0.53-2.44)          |
| <b>Örebro, C3</b>       | 900                         | 110 (12.2)       | 2 375                        | 284 (12.0)       | 0.98 (0.79-1.20)          | 43                                         | 9 (20.9)         | 154                         | 31<br>(20.1)     | 0.96 (0.50-1.87)          |
| <b>Göteborg, C4</b>     | 3 930                       | 423 (10.8)       | 5 314                        | 563 (10.6)       | 0.98 (0.87-1.11)          | 177                                        | 43<br>(24.3)     | 307                         | 62<br>(20.2)     | 0.83 (0.59-1.17)          |
| <b>Halland, C5</b>      | 1 539                       | 180 (11.7)       | 1 275                        | 130 (10.2)       | 0.87 (0.70-1.08)          | 33                                         | 6 (18.2)         | 21                          | 3 (14.3)         | 0.78 (0.22-2.84)          |
| <b>Stockholm, C6</b>    | 12<br>984                   | 1 429<br>(11.0)  | 8 578                        | 927 (10.8)       | 0.98 (0.91-1.06)          | 541                                        | 169<br>(31.2)    | 383                         | 97<br>(25.3)     | 0.81 (0.65-1.00)          |
| <b>Västerås, C7</b>     | 2 001                       | 259 (12.9)       | 652                          | 84 (12.9)        | 0.99 (0.79-1.25)          | 83                                         | 31 (37.3)        | 53                          | 18<br>(34.0)     | 0.91 (0.57-1.45)          |
| <b>Gotland, C8</b>      | 345                         | 48 (13.9)        | 68                           | 9 (13.2)         | 0.95 (0.49-1.85)          | 8                                          | 5 (62.5)         | 0                           | 0 (0.0)          | NA                        |

Data are n (%) unless stated otherwise.

C=cluster. CI=confidence interval. GDM gestational diabetes mellitus. LGA=large for gestational age. MI=multiple imputation. NA=not applicable. RR=relative risk ratio.

\*The cohort of women with fasting and 2-hour plasma glucose cut off between the WHO-2013 criteria and SWE-GDM criteria (fasting plasma glucose 5.1-6.9 and/or 2-h plasma glucose 8.5-8.8/8.9/9.9 mmol/L), untreated before and treated after the switch).

<sup>†</sup>Analysed with multilevel Poisson regression, cluster as random factor and period (January-March, April-June, July-September, October-December) as fixed factor..

<sup>‡</sup>Defined as birthweight above the 90<sup>th</sup> percentile in the Swedish reference population[1] corrected for gestational age and sex..

<sup>§</sup>with interaction term for study group x period (January-June vs July-December)..

\*\*Analysed with Poisson regression within each centre.

1. Maršál K, Persson PH, Larsen T, Lilja H, Selbing A, Sultan B. Intrauterine growth curves based on ultrasonically estimated foetal weights. Acta Paediatr. 1996;85(7):843-8.
