# Supplementary material for: Changing diagnostic criteria for gestational diabetes (CDC4G) in Sweden: A stepped wedge cluster randomised trial
Source: PubMed Central journal article supplement (PMC11262657; doi:10.1371/journal.pmed.1004420), 2024-07-08
Supplement: pmed.1004420.s021.pdf [file pmed.1004420.s021.pdf]

**S16 Table. Characteristics of the intention to treat population**

|                                       | Intention to treat population  |                  |                                 |                  |
|---------------------------------------|--------------------------------|------------------|---------------------------------|------------------|
|                                       | SWE-GDM criteria<br>(n=29 349) |                  | WHO-2013<br>criteria (n=29 034) |                  |
| <b>Maternal characteristics</b>       | n                              |                  | n                               |                  |
| Age at childbirth, years              | 29 349                         | 31.5 (28-35)     | 29 034                          | 31.3 (28-35)     |
| Body height at first visit, cm        | 28 464                         | 166 (162-170)    | 28 153                          | 166 (161-170)    |
| Body weight at first visit, kg        | 27 896                         | 66 (59-75)       | 27 682                          | 66 (59-76)       |
| BMI at first visit, kg/m <sup>2</sup> | 27 808                         | 23.8 (21.5-27.2) | 27 578                          | 24.0 (21.6-27.4) |
| Underweight (<18.5)                   |                                | 716 (2.6)        |                                 | 724 (2.6)        |
| Normal (18.5-24.9)                    |                                | 16 118 (58.0)    |                                 | 15 680 (56.9)    |
| Overweight (25.0-29.9)                |                                | 7 169 (25.8)     |                                 | 7 171 (26.0)     |
| Obesity class I (30.0-34.9)           |                                | 2 661 (9.6)      |                                 | 2 734 (9.9)      |
| Obesity class II (35.0-39.9)          |                                | 849 (3.0)        |                                 | 907 (3.3)        |
| Obesity class III (≥40.0)             |                                | 295 (1.1)        |                                 | 362 (1.3)        |
| Parity <sup>†</sup>                   | 29 342                         |                  | 29 022                          |                  |
| 0                                     |                                | 12 559 (42.8)    |                                 | 11 889 (41.0)    |
| 1                                     |                                | 10 960 (37.4)    |                                 | 10 839 (37.3)    |
| 2                                     |                                | 4 136 (14.1)     |                                 | 4 256 (14.7)     |
| 3                                     |                                | 1 096 (3.7)      |                                 | 1 298 (4.5)      |
| ≥4                                    |                                | 591 (2.0)        |                                 | 740 (2.6)        |
| Chronic hypertension <sup>‡</sup>     | 29 349                         | 207 (0.7)        | 29 034                          | 195 (0.7)        |
| Smoking at first visit                | 28 053                         |                  | 27 634                          |                  |
| No                                    |                                | 27 026 (96.3)    |                                 | 26 553 (96.1)    |
| 1-9 cig/day                           |                                | 858 (3.1)        |                                 | 866 (3.1)        |
| ≥10 cig/day                           |                                | 169 (0.6)        |                                 | 215 (0.8)        |
| Swedish snuff at first visit          | 29 286                         | 224 (0.8)        | 28 825                          | 254 (0.9)        |
| Country of birth <sup>§</sup>         | 29 339                         |                  | 29 032                          |                  |
| Sweden                                |                                | 19 850 (67.7)    |                                 | 19 625 (67.6)    |
| Europe except Sweden                  |                                | 3 332 (11.4)     |                                 | 3 111 (10.7)     |
| Middle East and North Africa          |                                | 3 213 (10.9)     |                                 | 3 097 (10.7)     |
| North America and Caribbean           |                                | 125 (0.4)        |                                 | 132 (0.4)        |
| South and Central America             |                                | 354 (1.2)        |                                 | 325 (1.1)        |
| Africa                                |                                | 1 392 (4.7)      |                                 | 1 693 (5.8)      |
| South East Asia                       |                                | 337 (1.1)        |                                 | 341 (1.2)        |
| Western Pacific                       |                                | 736 (2.5)        |                                 | 708 (2.4)        |

|                                                 |        |               |        |               |
|-------------------------------------------------|--------|---------------|--------|---------------|
| Highest education, years                        | 28 289 |               | 28 111 |               |
| <9 (school education)                           |        | 915 (3.2)     |        | 1 012 (3.6)   |
| 9 (school education)                            |        | 1 665 (5.9)   |        | 1 763 (6.3)   |
| 10-11 (school education)                        |        | 1 950 (6.9)   |        | 2 000 (7.1)   |
| 12 (school education)                           |        | 6 723 (23.8)  |        | 7 222 (25.7)  |
| <3 (college/university)                         |        | 4 419 (15.6)  |        | 4 171 (14.8)  |
| ≥3 (college/university)                         |        | 12 291 (43.4) |        | 11 594 (41.2) |
| Doctor/licentiate degree                        |        | 326 (1.1)     |        | 349 (1.2)     |
| Plasma glucose in OGTT group, mmol/L, mean (SD) |        |               |        |               |
| Fasting                                         | 8 869  | 4.9 (0.7)     | 7 746  | 4.8 (0.7)     |
| 1-hour                                          | 80     | 8.0 (2.1)     | 3 042  | 8.2 (2.0)     |
| 2-hour                                          | 9 100  | 6.9 (1.6)     | 7 808  | 6.8 (1.6)     |
| HbA1c in GDM group, mean (SD)                   | 494    | 36.9 (6.2)    | 825    | 34.9 (5.1)    |
| <b>Neonatal characteristics</b>                 | 29 289 |               | 28 977 |               |
| Boy                                             |        | 15 010 (51.2) |        | 14 747 (50.9) |
| Girl                                            |        | 14 279 (48.8) |        | 14 230 (49.1) |

Data are n (%) or median (IQR) unless stated otherwise.

BMI=body mass index. GDM=gestational diabetes mellitus.NA= not applicable. OGTT=oral glucose tolerance test. SD=standard deviation

<sup>†</sup>Number of previous deliveries; stillbirths or live births.

<sup>‡</sup>Hypertension known before pregnancy or new onset hypertension with blood pressure ≥140/90 mmHg before gestational week 20.

<sup>§</sup>Gr
