# Supplementary material for: Changing diagnostic criteria for gestational diabetes (CDC4G) in Sweden: A stepped wedge cluster randomised trial
Source: PubMed Central journal article supplement (PMC11262657; doi:10.1371/journal.pmed.1004420), 2024-07-08
Supplement: pmed.1004420.s023.pdf [file pmed.1004420.s023.pdf]

**S18 Table. Pre-specified maternal outcomes in the intention to treat**

|                                       | Intention to treat population     |                                    |                                           |                                           |
|---------------------------------------|-----------------------------------|------------------------------------|-------------------------------------------|-------------------------------------------|
|                                       | SWE-GDM<br>criteria<br>(n=29 349) | WHO-2013<br>criteria<br>(n=29 034) | WHO-2013 vs SWE-GDM                       |                                           |
|                                       |                                   |                                    | Adjusted 1 <sup>†</sup><br>RR (95% CI)    | Adjusted 2 <sup>‡</sup><br>RR (95% CI)    |
| Composite maternal outcome            | 3 327 (11.3)                      | 3 184 (11.0)                       | 0.96 (0.90-1.02)<br>P <sup>†</sup> =0.20  | 0.97 (0.92-1.02)<br>P <sup>‡</sup> =0.25  |
| Shoulder dystocia                     | 92 (0.31)                         | 51 (0.18)                          | 0.40 (0.26-0.63)<br>P <sup>†</sup> <0.001 | 0.40 (0.26-0.61)<br>P <sup>‡</sup> <0.001 |
| Perineal trauma (III-IV)              | 650 (2.2)                         | 602 (2.1)                          | 0.84 (0.73-0.97)<br>P <sup>†</sup> =0.016 | 0.85 (0.73-0.99)<br>P <sup>‡</sup> =0.045 |
| Postpartum haemorrhage<br>(≥1000 ml)  | 2 756 (9.4)                       | 2 655 (9.1)                        | 1.00 (0.91-1.08)<br>P <sup>†</sup> =0.92  | 1.00 (0.93-1.08)<br>P <sup>‡</sup> =0.92  |
| Treatment during pregnancy            |                                   |                                    |                                           |                                           |
| Diet only                             | 393 (1.3)                         | 940 (3.2)                          | 2.99 (1.84-4.86)<br>P <sup>†</sup> <0.001 | 2.98 (1.84-4.82)<br>P <sup>‡</sup> <0.001 |
| Metformin only                        | 272 (0.9)                         | 483 (1.7)                          | 1.92 (1.33-2.76)<br>P <sup>†</sup> <0.001 | 1.89 (1.31-2.71)<br>P <sup>‡</sup> <0.001 |
| Insulin only                          | 62 (0.21)                         | 88 (0.30)                          | 1.23 (0.85-1.78)<br>P <sup>†</sup> =0.27  | 1.22 (0.85-1.75)<br>P <sup>‡</sup> =0.27  |
| Metformin and insulin                 | 132 (0.45)                        | 216 (0.74)                         | 1.94 (1.15-3.27)<br>P <sup>†</sup> =0.013 | 1.88 (1.11-3.14)<br>P <sup>‡</sup> =0.019 |
| Gestational hypertension <sup>§</sup> | 784 (2.7)                         | 890 (3.1)                          | 1.00 (0.75-1.33)<br>P <sup>†</sup> =0.99  | 1.02 (0.76-1.38)<br>P <sup>‡</sup> =0.87  |

|                                |              |              |                                              |                                            |
|--------------------------------|--------------|--------------|----------------------------------------------|--------------------------------------------|
| Preeclampsia <sup>†</sup>      | 770 (2.6)    | 816 (2.8)    | 1.04 (0.87-1.25)<br>P <sup>‡</sup> =0.63     | 1.10 (0.88-1.37)<br>P <sup>‡</sup> =0.40   |
| Gestational weight gain (kg)** | 12.2 (5.7)   | 12.2 (5.8)   | -0.2 (-0.4 to 0.02)<br>P <sup>‡</sup> =0.070 | -0.2 (-0.4 to 0.1)<br>P <sup>‡</sup> =0.15 |
| Caesarean section              | 5 060 (17.2) | 5 000 (17.2) | 0.99 (0.94-1.04)<br>P <sup>‡</sup> =0.64     | 1.00 (0.96-1.05)<br>P <sup>‡</sup> =0.95   |
| Emergency caesarean section    | 3 737 (12.7) | 3 636 (12.5) | 0.98 (0.91-1.06)<br>P <sup>‡</sup> =0.70     | 0.99 (0.93-1.06)<br>P <sup>‡</sup> =0.82   |
| Elective caesarean section     | 1 323 (4.5)  | 1 364 (4.7)  | 0.99 (0.89-1.11)<br>P <sup>‡</sup> =0.90     | 1.00 (0.90-1.12)<br>P <sup>‡</sup> =0.96   |
| Instrumental delivery          | 1 573 (5.4)  | 1 519 (5.2)  | 0.99 (0.92-1.08)<br>P <sup>‡</sup> =0.89     | 1.00 (0.92-1.09)<br>P <sup>‡</sup> =0.91   |

Data are n (%) or mean (SD).

RR=relative risk ratio. CI=confidence interval. GDM=gestational diabetes mellitus. MI= multiple imputation. NA=not applicable.

<sup>†</sup>Analysed with multilevel mixed model adjusted for centre as random factor and period (January-March, April-June, July-September, October-December) as fixed factor. Mixed Poisson model for binary outcomes (gives relative risk ratios as association measures), mixed multi-nominal for categorical outcomes (gives odds ratios as association measures), mixed linear model for continuous outcomes (gives mean differences as association measures), and mixed negative binomial model for count data (gives mean ratios as association measures).

<sup>‡</sup>Adjusted for mother's age modelled by a linear, squared, and cubic term, chronic hypertension, smoking, snuff, country of birth, and parity. Multiple imputation used for missing data on potential confounding variables.

<sup>§</sup>Blood pressure  $\geq 140/90$  mmHg, measured two times with at least 4-hour interval after gestational week 20.

Women with chronic hypertension diagnosis were excluded.

<sup>¶</sup>Blood pressure  $\geq 140/90$  mmHg and newly onset proteinuria  $\geq 300$  mg/24 hours after gestational week 20.

\*\*Adjusted for weight at first visit. In the modified intention to treat population there were missing values for 2 162 women in the SWE-GDM group and for 2 445 in the WHO-2013 group.
