# Supplementary material for: Changing diagnostic criteria for gestational diabetes (CDC4G) in Sweden: A stepped wedge cluster randomised trial
Source: PubMed Central journal article supplement (PMC11262657; doi:10.1371/journal.pmed.1004420), 2024-07-08
Supplement: pmed.1004420.s024.pdf [file pmed.1004420.s024.pdf]

**S19 Table. List of site principal investigators**

| Centre       | Name                                                |
|--------------|-----------------------------------------------------|
| Gotland      | Åsa Hedqvist                                        |
| Västerås     | Anette Gunnarsson                                   |
| Stockholm    | Elisabeth Storck-Lindholm and Sophia Brismar Wendel |
| Halland      | Ann Johansson                                       |
| Gothenburg   | Verena Sengpiel                                     |
| Örebro       | Helena Backman                                      |
| Uppsala      | Annika Esscher                                      |
| Dalarna      | Sara Hogmark                                        |
| Malmö        | Kerstin Berntorp and Karl Kristensen                |
| Lund         | Helena Strevens                                     |
| Kristianstad | Helene Holmer                                       |
